# Supplementary material for: Saccharomonosporine A inspiration; synthesis of potent analogues as potential PIM kinase inhibitors
Source: Royal Society of Chemistry journal article supplement (doi:10.1039/c9ra10216g), 2020-01-01
Supplement: c9ra10216g1.pdf [file c9ra10216g1.pdf]

## Supplementary material

### Saccharomonosporine A Inspiration; Synthesis of Potent Analogues as Potential PIM Kinases Inhibitors

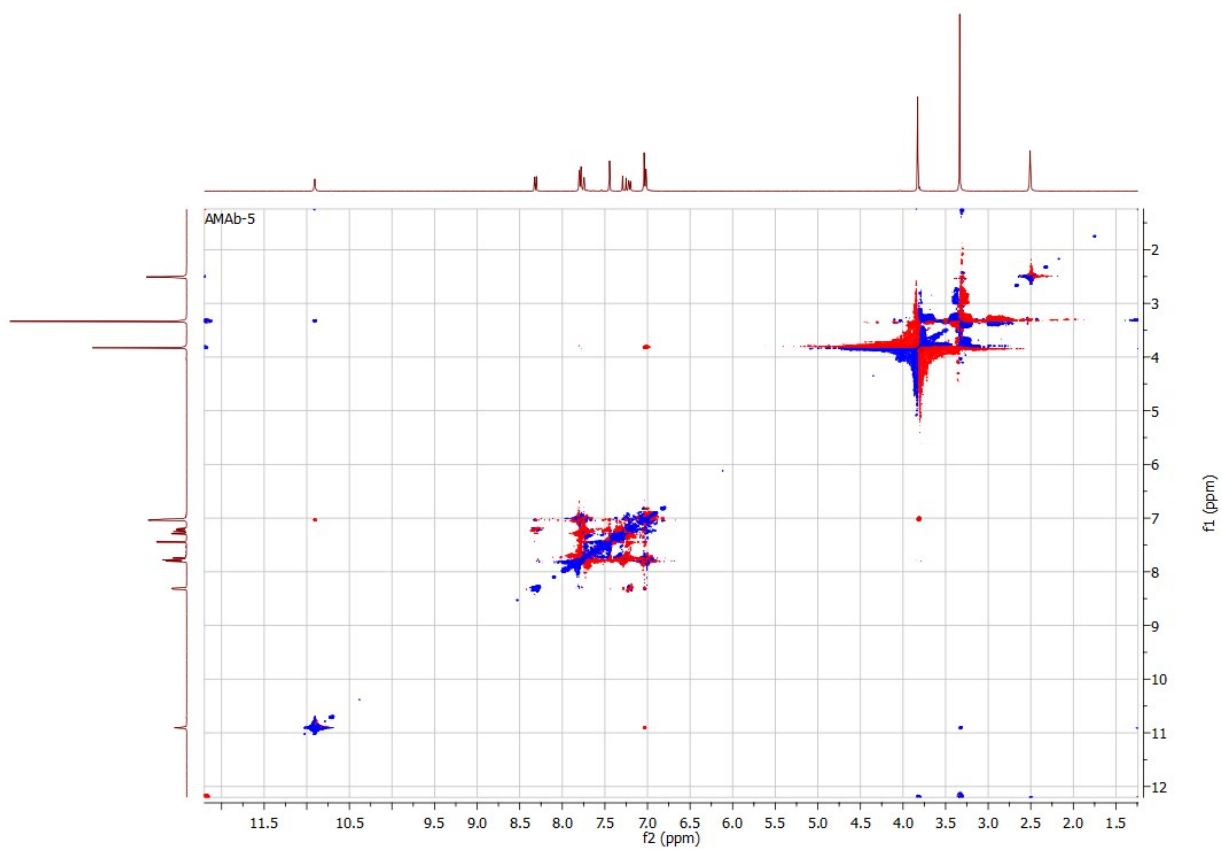

**SI.**  $^1\text{H}$ - $^1\text{H}$  NOESY chart for compound 5.

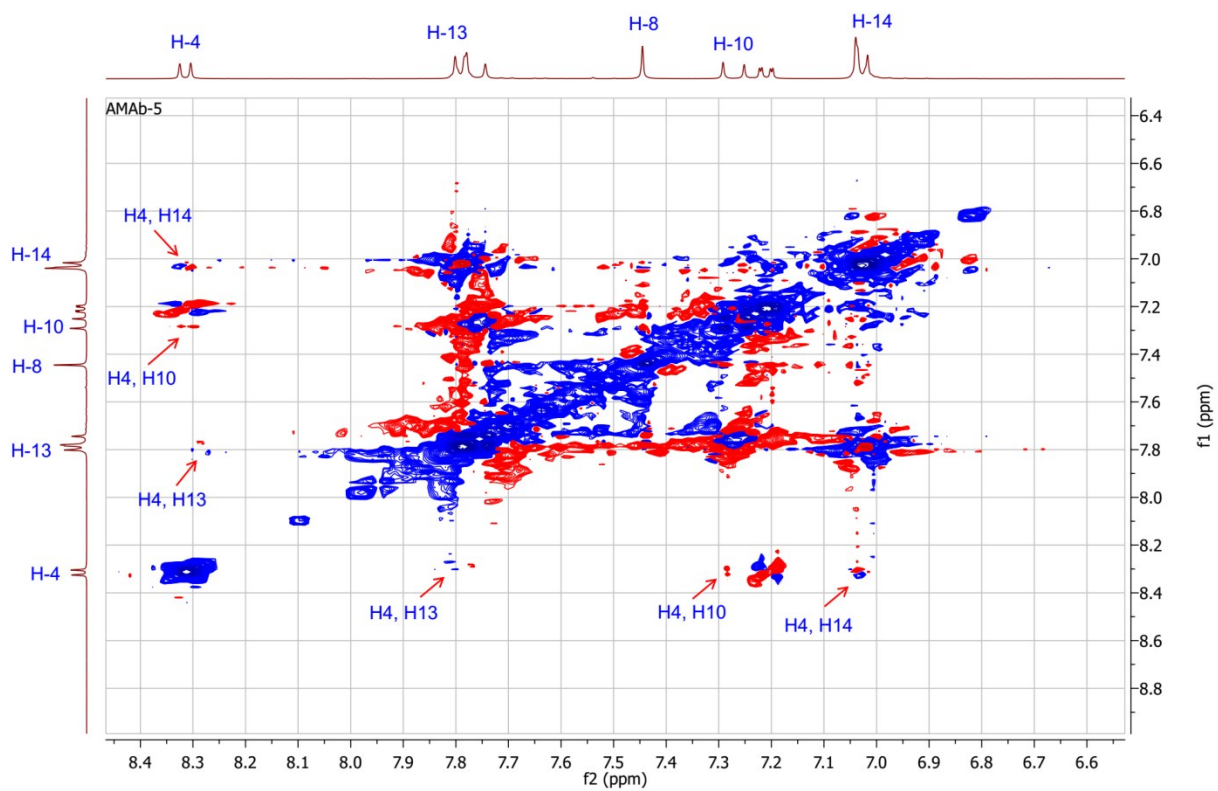

**S2.**  $^1\text{H}$ - $^1\text{H}$  NOESY chart for compound **5**.

| No.                        | $\delta_{\text{Exp/ppm}}$ | $\delta_{\text{Calc/ppm}}$ ( <i>E</i> isomer) | $\delta_{\text{Calc/ppm}}$ ( <i>Z</i> isomer) |
|----------------------------|---------------------------|-----------------------------------------------|-----------------------------------------------|
| 1                          | 10.9                      | 10.61                                         | 10.61                                         |
| 2                          | -                         | -                                             | -                                             |
| 3                          | -                         | -                                             | -                                             |
| 3a                         | -                         | -                                             | -                                             |
| 4                          | 8.31                      | 7.4                                           | 7.5                                           |
| 5                          | 7.21                      | 7.4                                           | 7.43                                          |
| 6                          | -                         | -                                             | -                                             |
| 7                          | 7.44                      | 7.58                                          | 7.59                                          |
| 7a                         | -                         | -                                             | -                                             |
| 8                          | 7.72                      | 7.66                                          | 7.01                                          |
| 9                          | -                         | -                                             | -                                             |
| 10                         | 7.27                      | 7.06                                          | 6.95                                          |
| 11                         | 7.76                      | 8.06                                          | 8                                             |
| 12                         | -                         | -                                             | -                                             |
| 13                         | 7.79                      | 7.53                                          | 7.53                                          |
| 14                         | 7.03                      | 7.01                                          | 7                                             |
| 15                         | -                         | -                                             | -                                             |
| 16                         | 3.84                      | 3.81                                          | 3.8                                           |
| Calculated Relative Energy |                           | MMFF Energy= 40.1537 kcal/mol                 | MMFF Energy= 45.2583 kcal/mol                 |

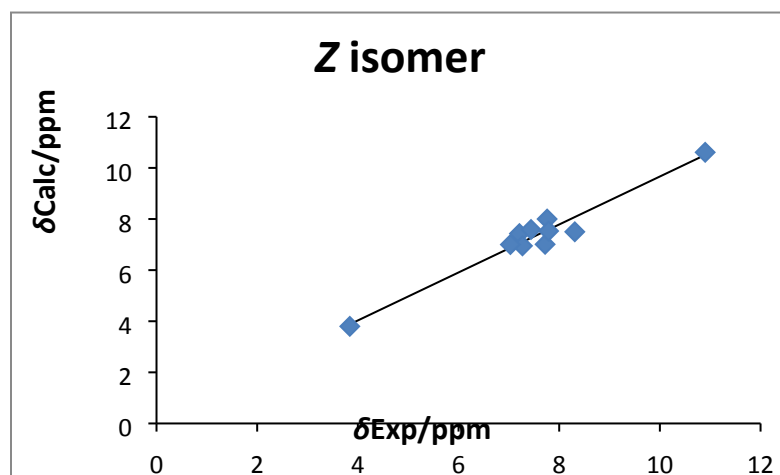

**S3.** Theoretical calculations of  $^1\text{H}$  NMR chemical shifts of compound 5 in *E* isomer.

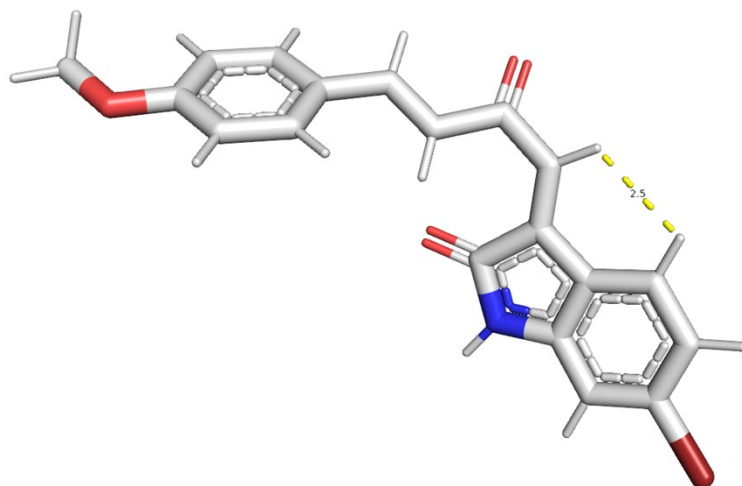

S4:  $^1\text{H}$ - $^1\text{H}$  correlations of cis isomer of compound 5.

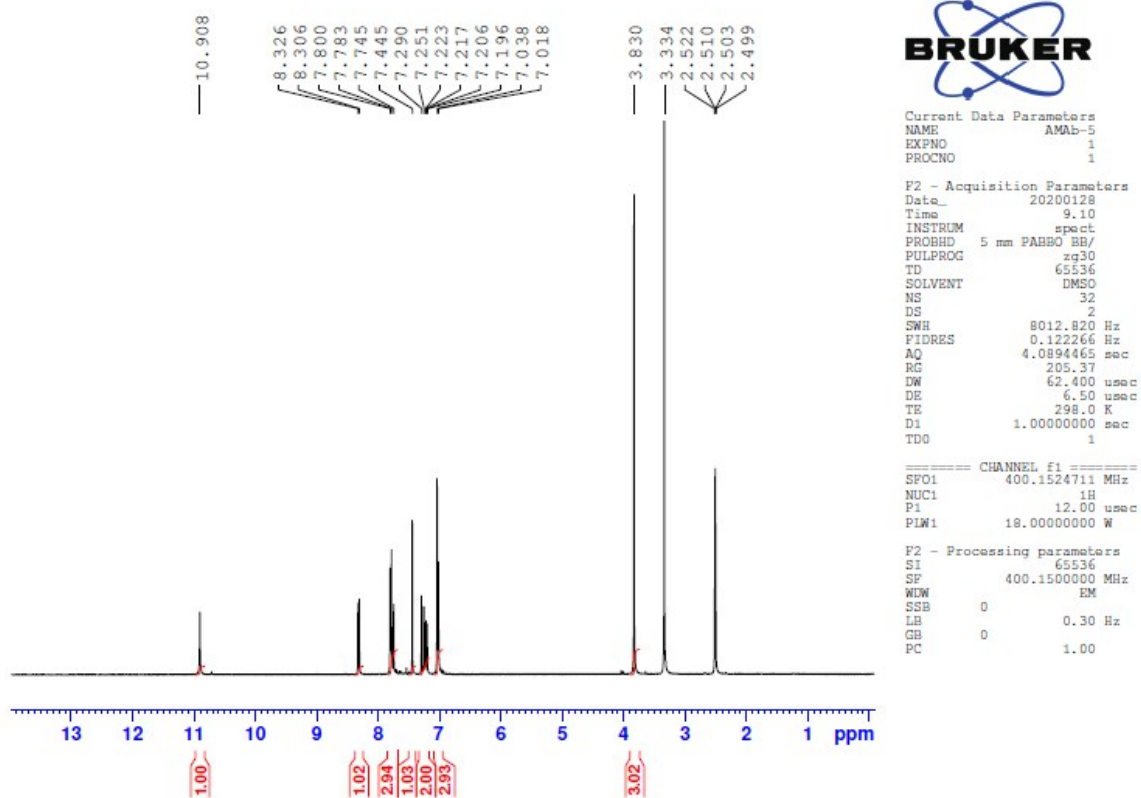

S5:  $^1\text{H}$ NMR of compound 5.

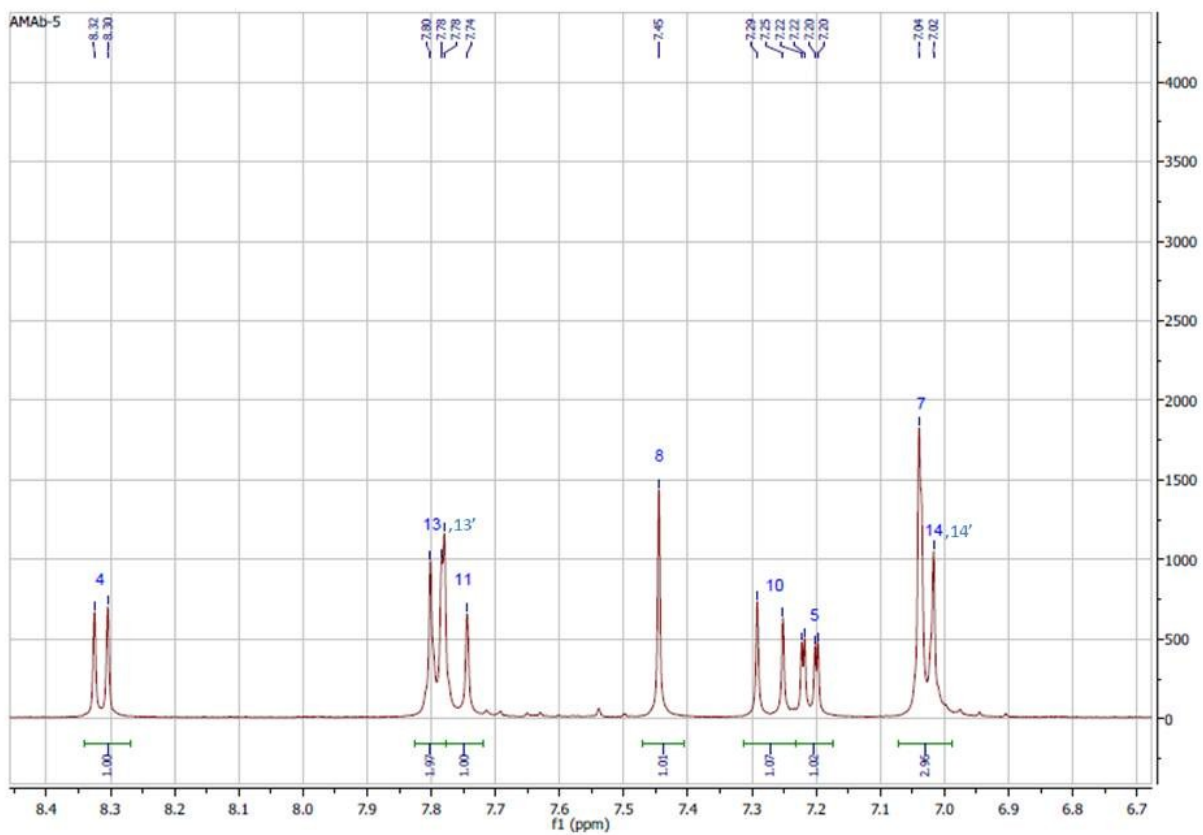

**S6:**  $^1\text{H}$ NMR of compound **5**.

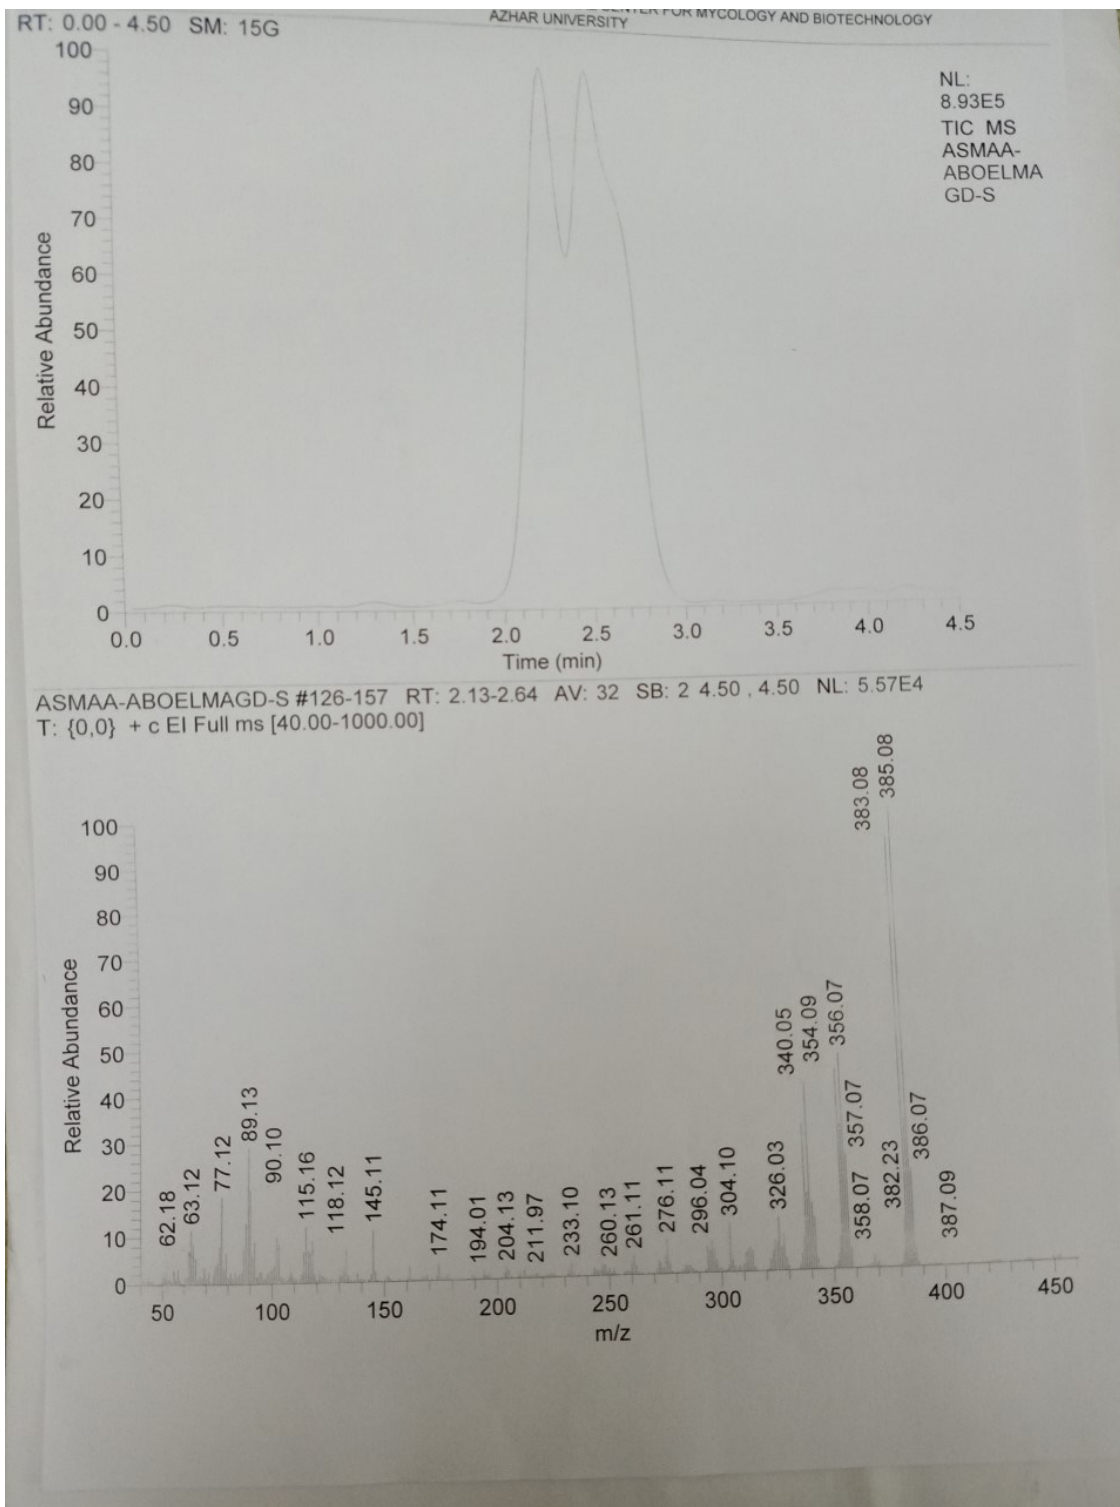

**S7:** Mass spectrum of compound 5.
